# Supplementary material for: Polythiophenes with Cationic Phosphonium Groups as Vectors for Imaging, siRNA Delivery, and Photodynamic Therapy
Source: Nanomaterials (Basel). 2020 Jul 22;10(8):1432. doi: 10.3390/nano10081432 (PMC7466636; doi:10.3390/nano10081432)
Supplement: Supplementary file 1 [file nanomaterials-10-01432-s001.pdf]

## Supporting Information

# Polythiophenes with Cationic Phosphonium Groups as Vectors for Imaging, siRNA Delivery, and Photodynamic Therapy

Laure Lichon <sup>1</sup>, Clément Kotras <sup>2,3</sup>, Bauyrzhan Myrzakhmetov <sup>4</sup>, Philippe Arnoux <sup>4</sup>, Morgane Daurat <sup>5</sup>, Christophe Nguyen <sup>1</sup>, Denis Durand <sup>1</sup>, Karim Bouchmella <sup>3</sup>, Lamiaa Mohamed Ahmed Ali <sup>1,6</sup>, Jean-Olivier Durand <sup>3</sup>, Sébastien Richeter <sup>3</sup>, Céline Frochot <sup>4</sup>, Magali Gary-Bobo <sup>1,\*</sup>, Mathieu Surin <sup>2</sup> and Sébastien Clément <sup>3,\*</sup>

- <sup>1</sup> IBMM, University of Montpellier, CNRS, ENSCM, 34093 Montpellier, France; laure.lichon@umontpellier.fr (L.L.); christophe.nguyen@umontpellier.fr (C.N.); denis.durand@umontpellier.fr (D.D.); lamiaa.ali@umontpellier.fr (L.M.A.A.)
- <sup>2</sup> Center of Innovation and Research in Materials and Polymers (CIRMAP), University of Mons—UMONS, 20 Place du Parc, 7000 Mons, Belgium; clement.kotras@umons.ac.be (C.K.); mathieu.surin@umons.ac.be (M.S.)
- <sup>3</sup> ICGM, University of Montpellier, CNRS, ENSCM, CC1701, Place Eugène Bataillon, 34095 Montpellier, France; karim.bouchmella@umontpellier.fr (K.B.); jean-olivier.durand@umontpellier.fr (J.-O.D.); sebastien.richeter@umontpellier.fr (S.R.)
- <sup>4</sup> Laboratoire Réactions et Génie des Procédés (LRGP), UMR 7274, Université de Lorraine, CNRS, 54000 Nancy, France; Bauyrzhan.myrzakhmetov@univ-lorraine.fr (B.M.); Philippe.Arnoux@univ-lorraine.fr (P.A.); celine.frochot@univ-lorraine.fr (C.F.)
- <sup>5</sup> NanoMedSyn, 15 Avenue Charles Flahault, 34093 Montpellier, France; morgane.daurat@umontpellier.fr
- <sup>6</sup> Department of Biochemistry, Medical Research Institute, University of Alexandria, Alexandria 21561, Egypt
- \* Correspondence: [magali.gary-bobo@inserm.fr](mailto:magali.gary-bobo@inserm.fr) (M.G.-B.); [sebastien.clement1@umontpellier.fr](mailto:sebastien.clement1@umontpellier.fr) (S.C.); Tel.: +33(0)-4-11-75-96-17 (M.G.-B.); +33(0)-4-67-16-14-39-71 (S.C.)

### Table of contents

|                                                                                                                                                                                                                                                                                                                                                                                                                                                                                                                                                                                                          |    |
|----------------------------------------------------------------------------------------------------------------------------------------------------------------------------------------------------------------------------------------------------------------------------------------------------------------------------------------------------------------------------------------------------------------------------------------------------------------------------------------------------------------------------------------------------------------------------------------------------------|----|
| Figure S1: Fluorescence decay of <b>PTH1</b> (0.37 $\mu$ M), <b>PTH2</b> (0.68 $\mu$ M) and <b>PTH3</b> (0.81 $\mu$ M) in water in D <sub>2</sub> O ( $\lambda_{exc}$ = 407 nm)                                                                                                                                                                                                                                                                                                                                                                                                                          | S2 |
| Figure S2. Singlet oxygen emission spectra of <b>PTH1</b> , <b>PTH2</b> and <b>PTH3</b> in D <sub>2</sub> O ( $\lambda_{exc}$ = 466 nm)                                                                                                                                                                                                                                                                                                                                                                                                                                                                  | S2 |
| Figure S3. Particle Size distribution of <b>PTH1</b> in water (5 $\mu$ M) at 25°C.                                                                                                                                                                                                                                                                                                                                                                                                                                                                                                                       | S3 |
| Figure S4. Particle Size distribution of <b>PTH2</b> in water (5 $\mu$ M) at 25°C.                                                                                                                                                                                                                                                                                                                                                                                                                                                                                                                       | S3 |
| Figure S5. Particle Size distribution of <b>PTH3</b> in water (5 $\mu$ M) at 25°C.                                                                                                                                                                                                                                                                                                                                                                                                                                                                                                                       | S4 |
| Figure S6. Particle size distribution (up) and zeta potential (down) of <b>PTH2/siRNA</b> polyplex in water (5 $\mu$ M) at a P <sup>+</sup> /P <sup>-</sup> ratio of 100 at 25°C.                                                                                                                                                                                                                                                                                                                                                                                                                        | S5 |
| Figure S7. Particle size distribution (up) and zeta potential (down) of <b>PTH3/siRNA</b> polyplex in water (5 $\mu$ M) at a P <sup>+</sup> /P <sup>-</sup> ratio of 100 at 25°C.                                                                                                                                                                                                                                                                                                                                                                                                                        | S6 |
| Figure S8. (A) <b>MDA-MB-231</b> cells were incubated with <b>PTH1</b> , <b>PTH2</b> , <b>PTH3</b> during 72 h. Cells were irradiated using confocal microscope with a chameleon laser beam at 800 nm, magnification x10, during 3 x 1.57 seconds. Two days after irradiation, cells were submitted to a MTT assay to quantify the cell death. (B) <b>MDA-MB-231</b> cells were incubated with or without <b>PTH1</b> , <b>PTH2</b> , <b>PTH3</b> during 24 h. Cells were incubated with Hoechst 15 min. They were imaged at 800 nm for polythiophenes and 760 nm for Hoechst using confocal microscope. | S7 |

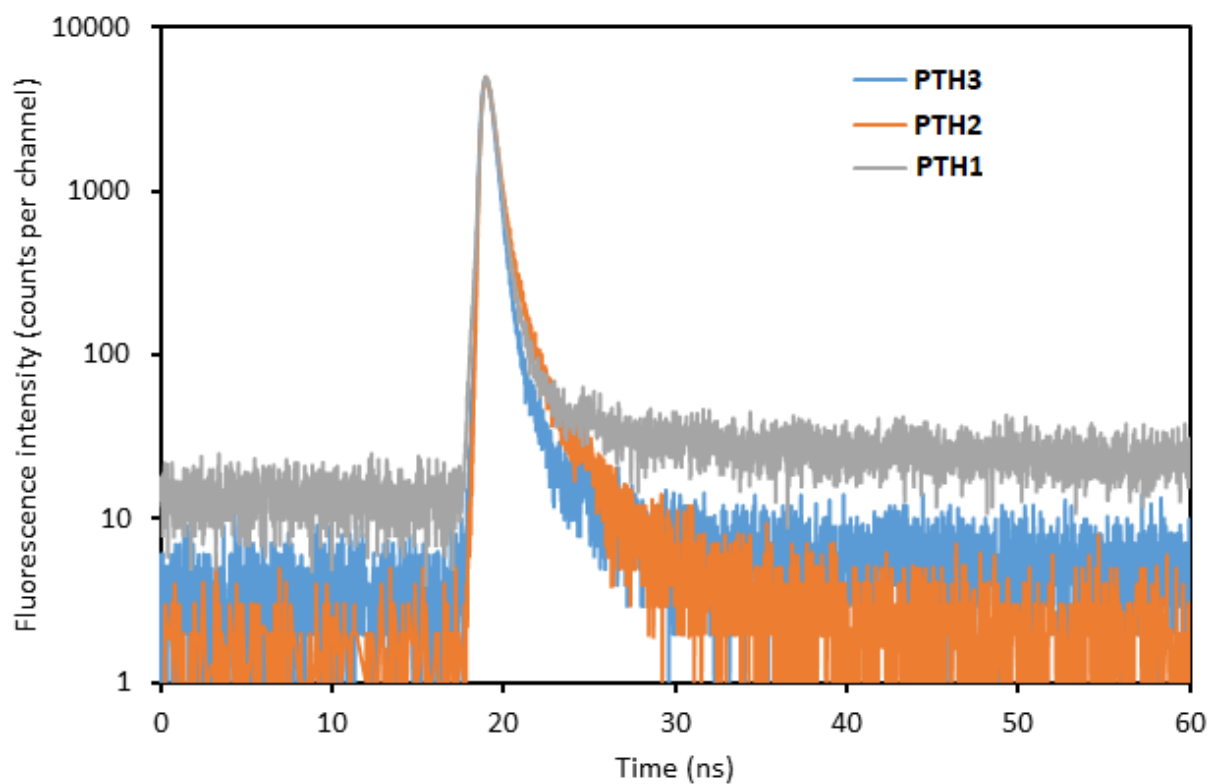

**Figure S1.** Fluorescence decay of **PTH1** (0.37  $\mu\text{M}$ ), **PTH2** (0.68  $\mu\text{M}$ ) and **PTH3** (0.81  $\mu\text{M}$ ) in water in D<sub>2</sub>O ( $\lambda_{\text{exc}} = 407 \text{ nm}$ ).

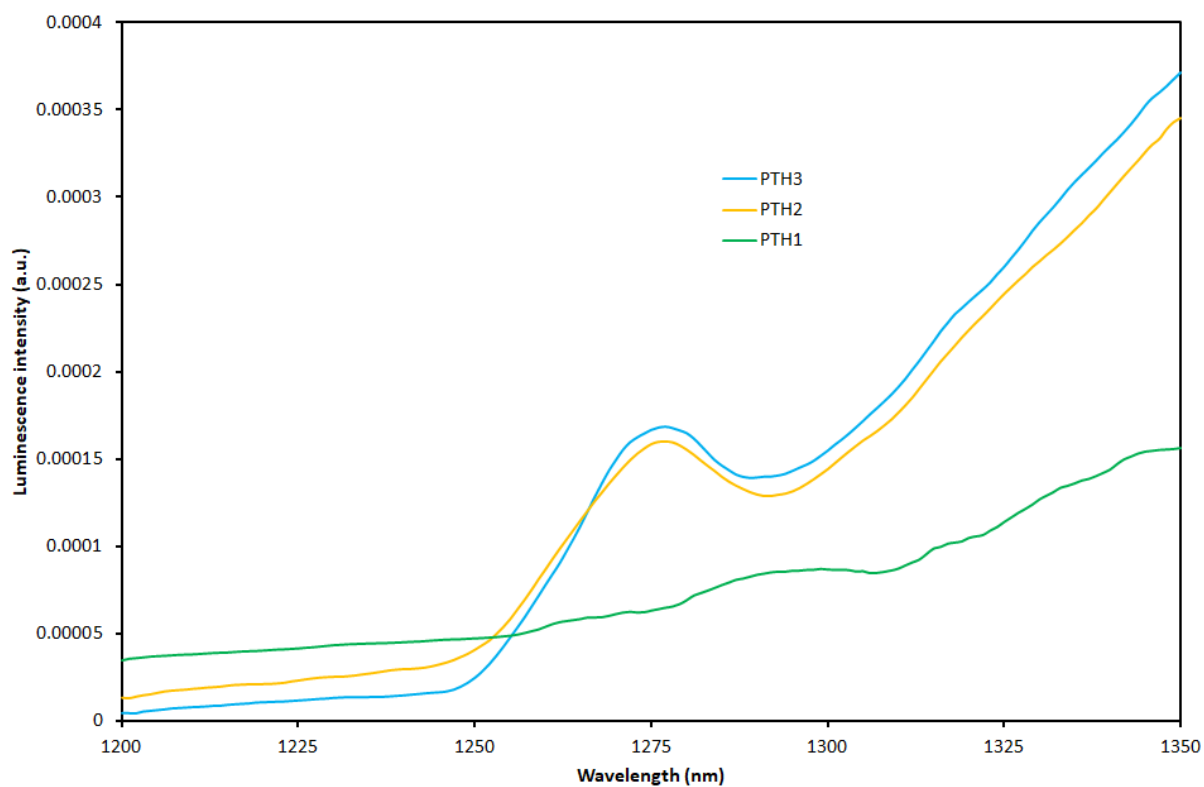

**Figure S2.** Singlet oxygen emission spectra of **PTH1**, **PTH2** and **PTH3** in D<sub>2</sub>O ( $\lambda_{\text{exc}} = 466 \text{ nm}$ ).

|                               | Size (d.nm...        | % Intensity: | St Dev (d.n... |
|-------------------------------|----------------------|--------------|----------------|
| <b>Z-Average (d.nm):</b> 1647 | <b>Peak 1:</b> 526,6 | 100,0        | 51,88          |
| <b>PdI:</b> 0,536             | <b>Peak 2:</b> 0,000 | 0,0          | 0,000          |
| <b>Intercept:</b> 0,882       | <b>Peak 3:</b> 0,000 | 0,0          | 0,000          |

**Result quality** Refer to quality report

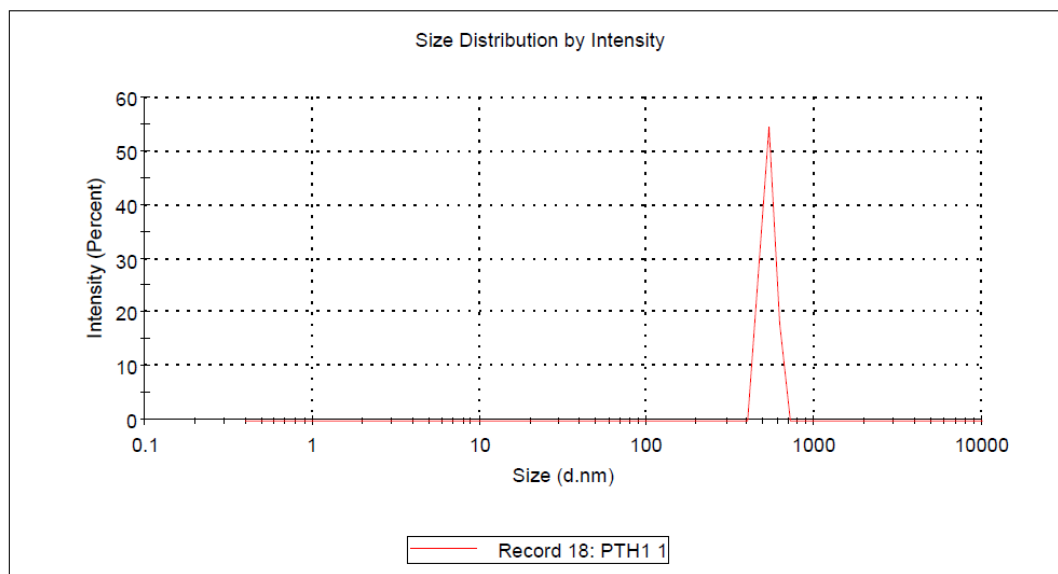

**Figure S3.** Particle Size distribution of **PTH1** in water (5  $\mu$ M) at 25°C.

|                                | Size (d.nm...        | % Intensity: | St Dev (d.n... |
|--------------------------------|----------------------|--------------|----------------|
| <b>Z-Average (d.nm):</b> 110,3 | <b>Peak 1:</b> 129,6 | 81,1         | 80,85          |
| <b>PdI:</b> 0,386              | <b>Peak 2:</b> 847,6 | 18,9         | 418,2          |
| <b>Intercept:</b> 0,760        | <b>Peak 3:</b> 0,000 | 0,0          | 0,000          |

**Result quality** Good

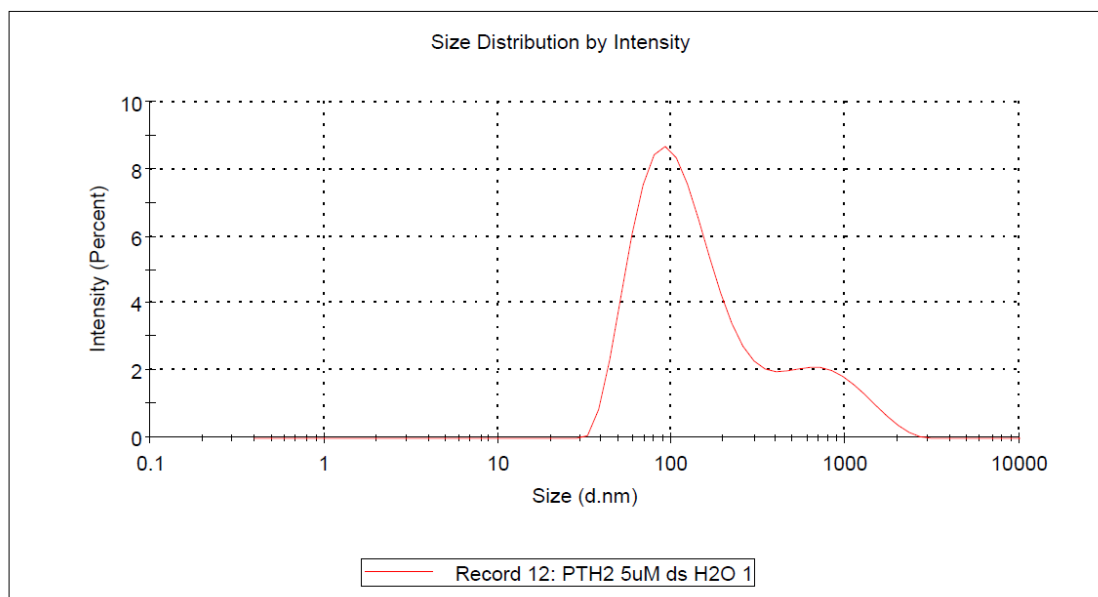

**Figure S4.** Particle Size distribution of **PTH2** in water (5  $\mu$ M) at 25°C.

|                                | Size (d.n...         | % Number: | St Dev (d.n... |
|--------------------------------|----------------------|-----------|----------------|
| <b>Z-Average (d.nm):</b> 102,6 | <b>Peak 1:</b> 48,67 | 100,0     | 16,81          |
| <b>Pdl:</b> 0,327              | <b>Peak 2:</b> 0,000 | 0,0       | 0,000          |
| <b>Intercept:</b> 0,648        | <b>Peak 3:</b> 0,000 | 0,0       | 0,000          |

**Result quality** Good

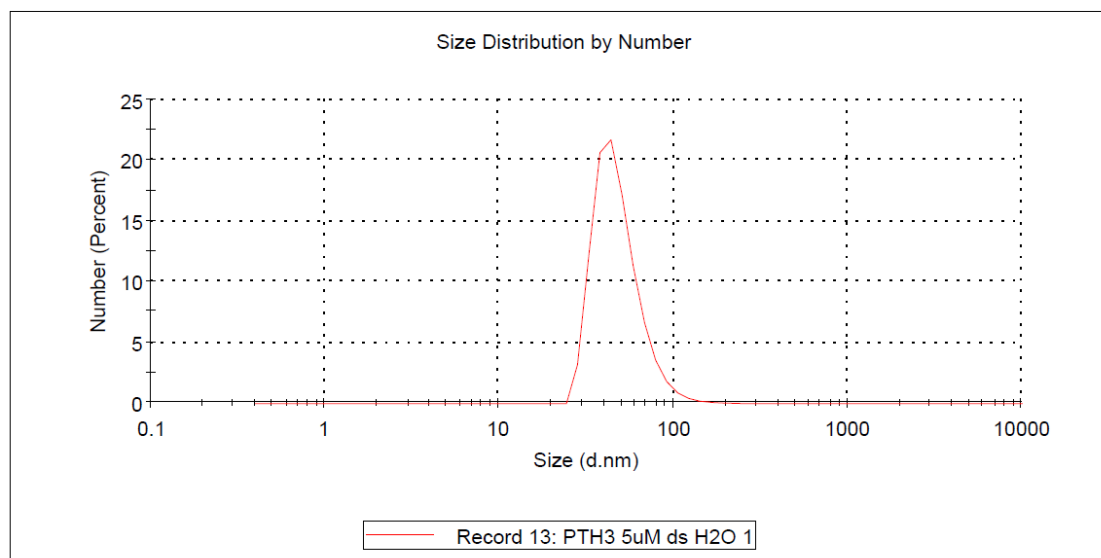

**Figure S5.** Particle Size distribution of **PTH3** in water (5  $\mu$ M) at 25°C.

|                                |                      |       |       |
|--------------------------------|----------------------|-------|-------|
| <b>Z-Average (d.nm):</b> 82,12 | <b>Peak 1:</b> 115,5 | 100,0 | 70,74 |
| <b>Pdl:</b> 0,248              | <b>Peak 2:</b> 0,000 | 0,0   | 0,000 |
| <b>Intercept:</b> 0,900        | <b>Peak 3:</b> 0,000 | 0,0   | 0,000 |

**Result quality** Good

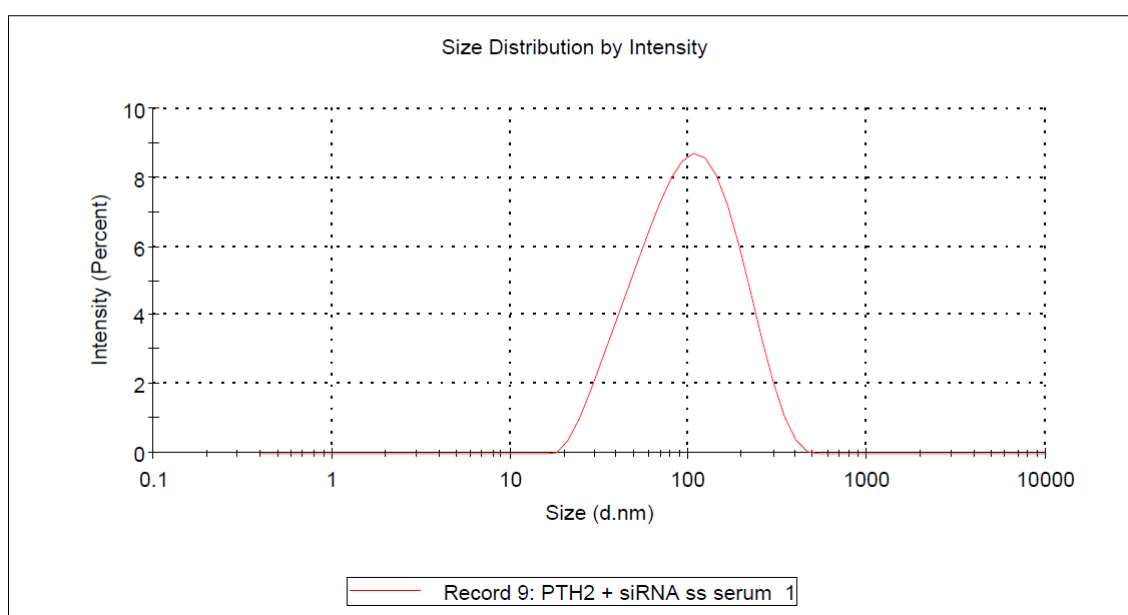

|                                                 | Mean (mV)            | Area (%) | St Dev (mV) |
|-------------------------------------------------|----------------------|----------|-------------|
| <b>Zeta Potential (mV):</b> 15,2                | <b>Peak 1:</b> 15,6  | 98,4     | 10,4        |
| <b>Zeta Deviation (mV):</b> 11,1                | <b>Peak 2:</b> -20,0 | 1,6      | 3,68        |
| <b>Conductivity (mS/cm):</b> 0,0508             | <b>Peak 3:</b> 0,00  | 0,0      | 0,00        |
| <b>Result quality</b> See result quality report |                      |          |             |

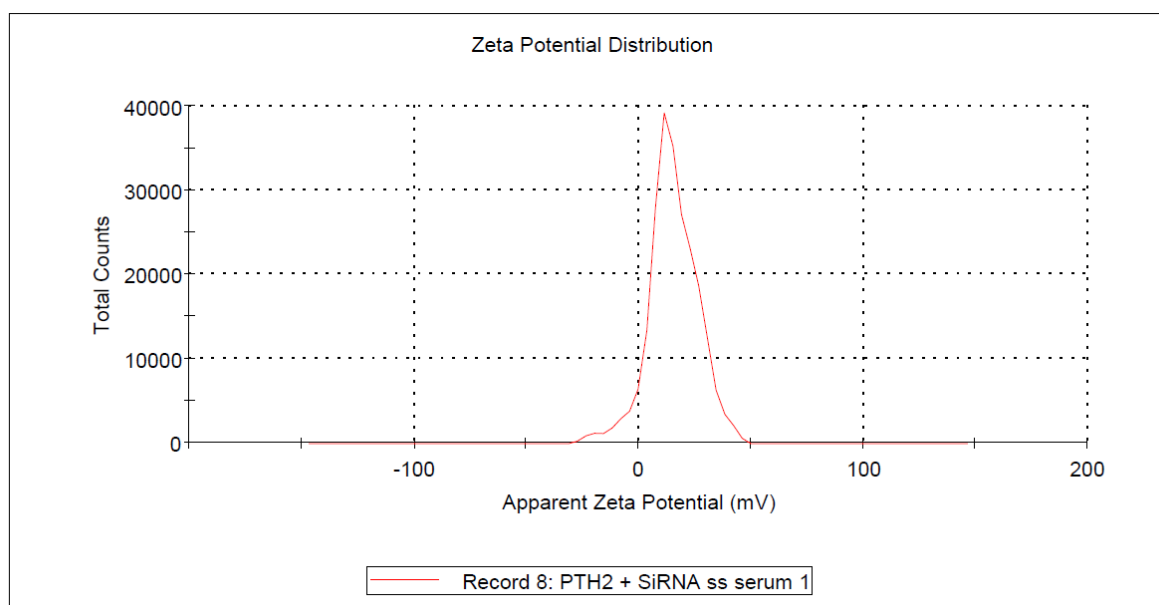

**Figure S6.** Particle size distribution (up) and zeta potential (down) of **PTH2/siRNA** polyplex in water (5  $\mu$ M) at a P<sup>+</sup>/P<sup>-</sup> ratio of 100 at 25°C.

|                                | Size (d.n...         | % Number: | St Dev (d.n... |
|--------------------------------|----------------------|-----------|----------------|
| <b>Z-Average (d.nm):</b> 92,43 | <b>Peak 1:</b> 22,43 | 100,0     | 7,803          |
| <b>Pdl:</b> 0,433              | <b>Peak 2:</b> 0,000 | 0,0       | 0,000          |
| <b>Intercept:</b> 0,722        | <b>Peak 3:</b> 0,000 | 0,0       | 0,000          |
| <b>Result quality</b> Good     |                      |           |                |

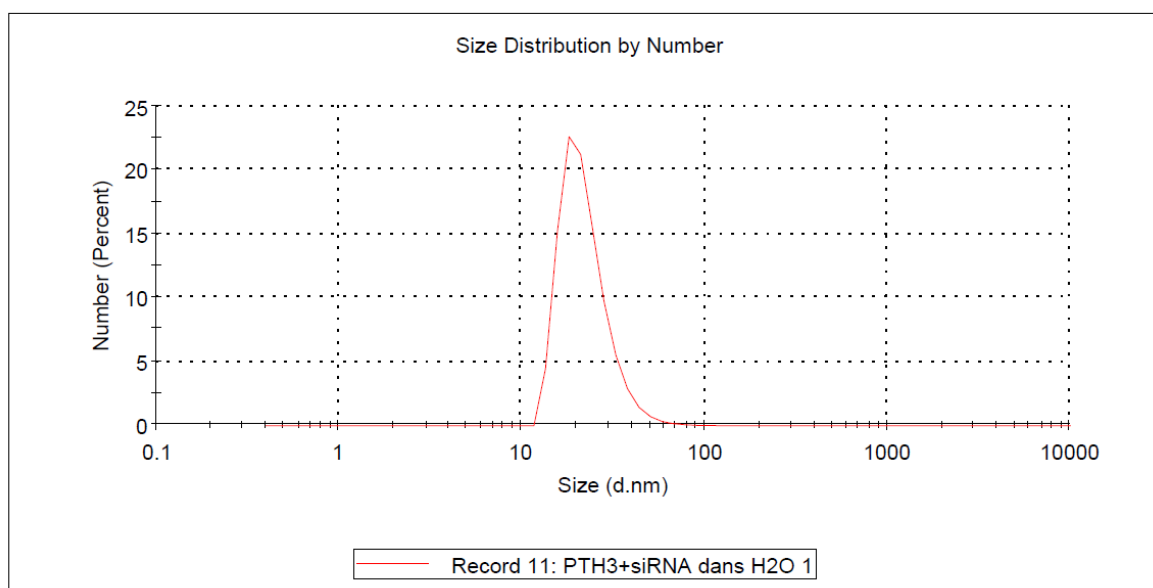

|                                                 | Mean (mV)            | Area (%) | St Dev (mV) |
|-------------------------------------------------|----------------------|----------|-------------|
| <b>Zeta Potential (mV):</b> 20,2                | <b>Peak 1:</b> 19,6  | 96,0     | 10,4        |
| <b>Zeta Deviation (mV):</b> 12,0                | <b>Peak 2:</b> 51,0  | 3,2      | 5,44        |
| <b>Conductivity (mS/cm):</b> 0,0739             | <b>Peak 3:</b> -26,9 | 0,6      | 2,05        |
| <b>Result quality</b> See result quality report |                      |          |             |

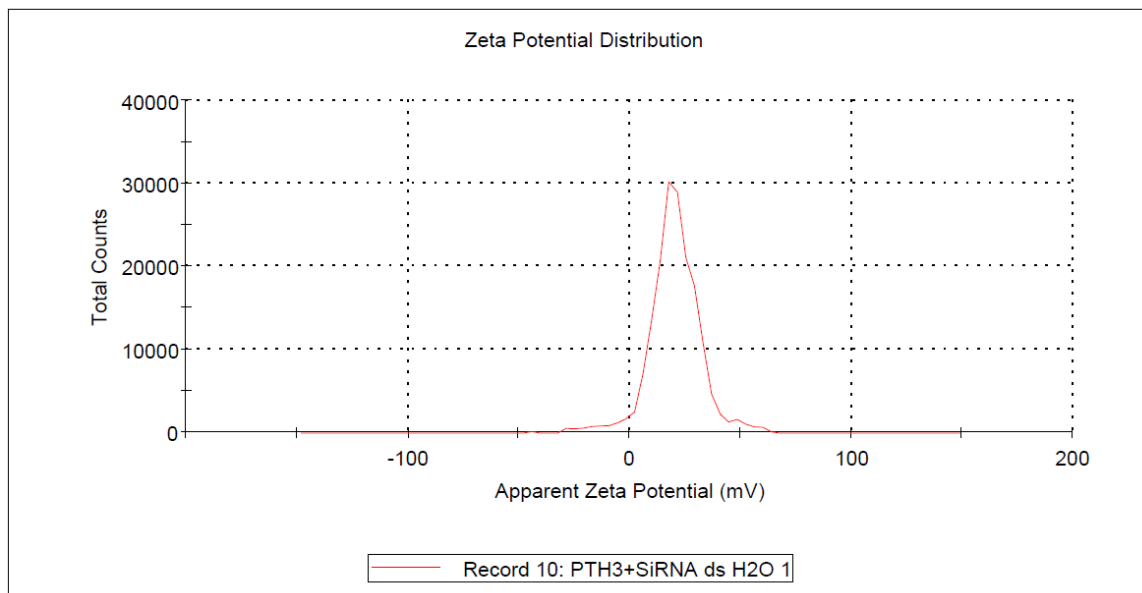

**Figure S7.** Particle size distribution (up) and zeta potential (down) of **PTH3/siRNA** polyplex in water (5  $\mu$ M) at a P<sup>+</sup>/P<sup>-</sup> ratio of 100 at 25°C.

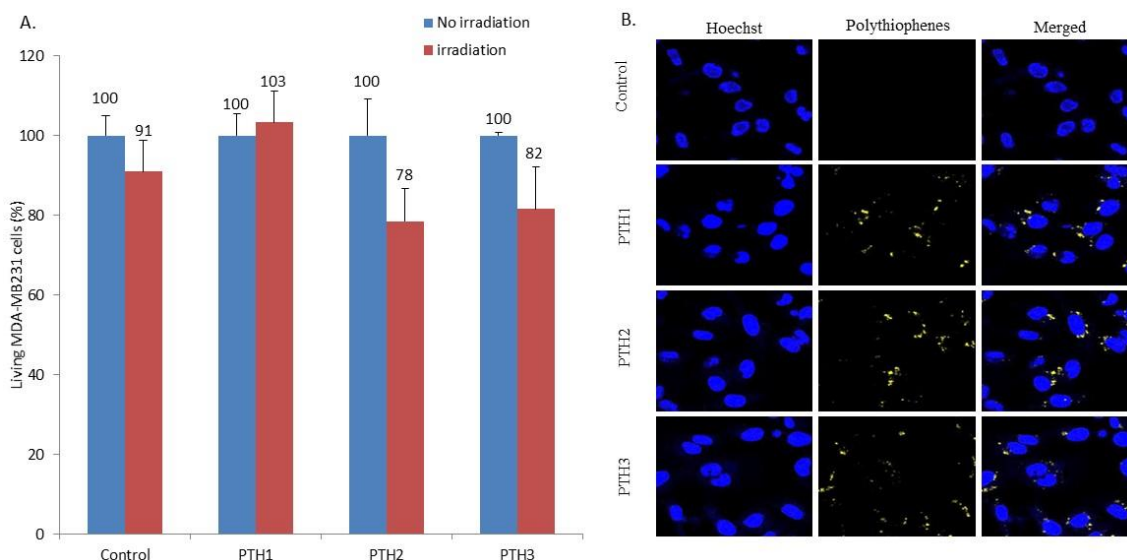

**Figure S8.** (A) MDA-MB-231 cells were incubated with **PTH1**, **PTH2**, **PTH3** during 72 h. Cells were irradiated using confocal microscope with a chameleon laser beam at 800 nm, magnification x10, during 3 x 1.57 seconds. Two days after irradiation, cells were submitted to a MTT assay to quantify the cell death. (B) MDA-MB-231 cells were incubated with or without **PTH1**, **PTH2**, **PTH3** during 24 h. Cells were incubated with Hoechst 15 min. They were imaged at 800 nm for polythiophenes and 760 nm for Hoechst using confocal microscope.
